# Supplementary material for: Effect of the Ag evolution process on ordering the transition for L10-FePt nanoparticles synthesized by Ag addition
Source: Royal Society of Chemistry journal article supplement (doi:10.1039/d2nj00337f), 2022-01-01
Supplement: d2nj00337f1.pdf [file d2nj00337f1.pdf]

## Electronic Supplementary Information

### Effect of Ag evolution process on ordering transition for $L1_0$ -FePt nanoparticles synthesized by Ag addition

Dong Zhao,<sup>a</sup> Ling Chang,<sup>b</sup> Xiaoyang Wang,<sup>b</sup> Kexin Liu,<sup>a</sup> Qunshou Wang,<sup>a</sup> Zhimeng Sun,<sup>a</sup> Chuanzhi Liu,<sup>a</sup> Jianjun Wang,<sup>a</sup> Qiang Wang,<sup>b</sup> and Wenli Pei<sup>\*a</sup>

<sup>a</sup> Key Laboratory of Anisotropy and Texture of Materials (Ministry of Education),  
Northeastern University, Shenyang 110819, China.

<sup>b</sup> Key Laboratory of Electromagnetic Processing of Materials (Ministry of Education),  
Northeastern University, Shenyang 110819, China.

\* Corresponding author.

E-mail address: peiwl@atm.neu.edu.cn (Wenli Pei).

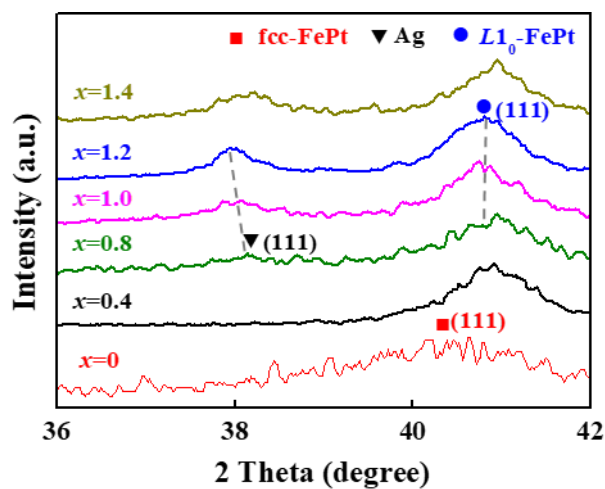

**Fig. S1.** Enlarged sections of the XRD patterns of the as-synthesized NPs with various Ag/Pt molar ratios ( $x$ ).

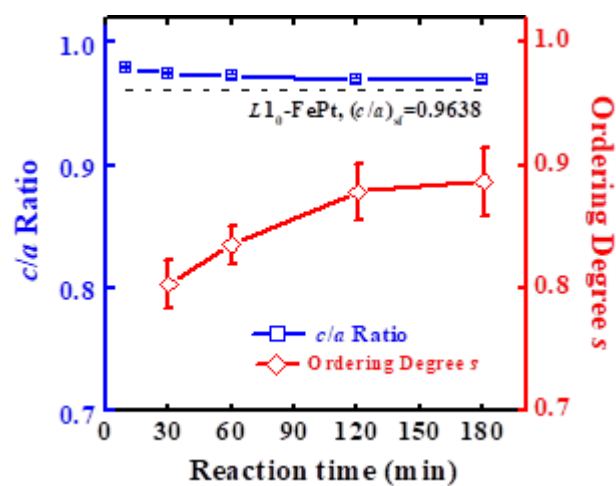

**Fig. S2.** The  $c/a$  ratios and ordering degrees  $s$  of the NPs collected at 360 °C for different reaction times.

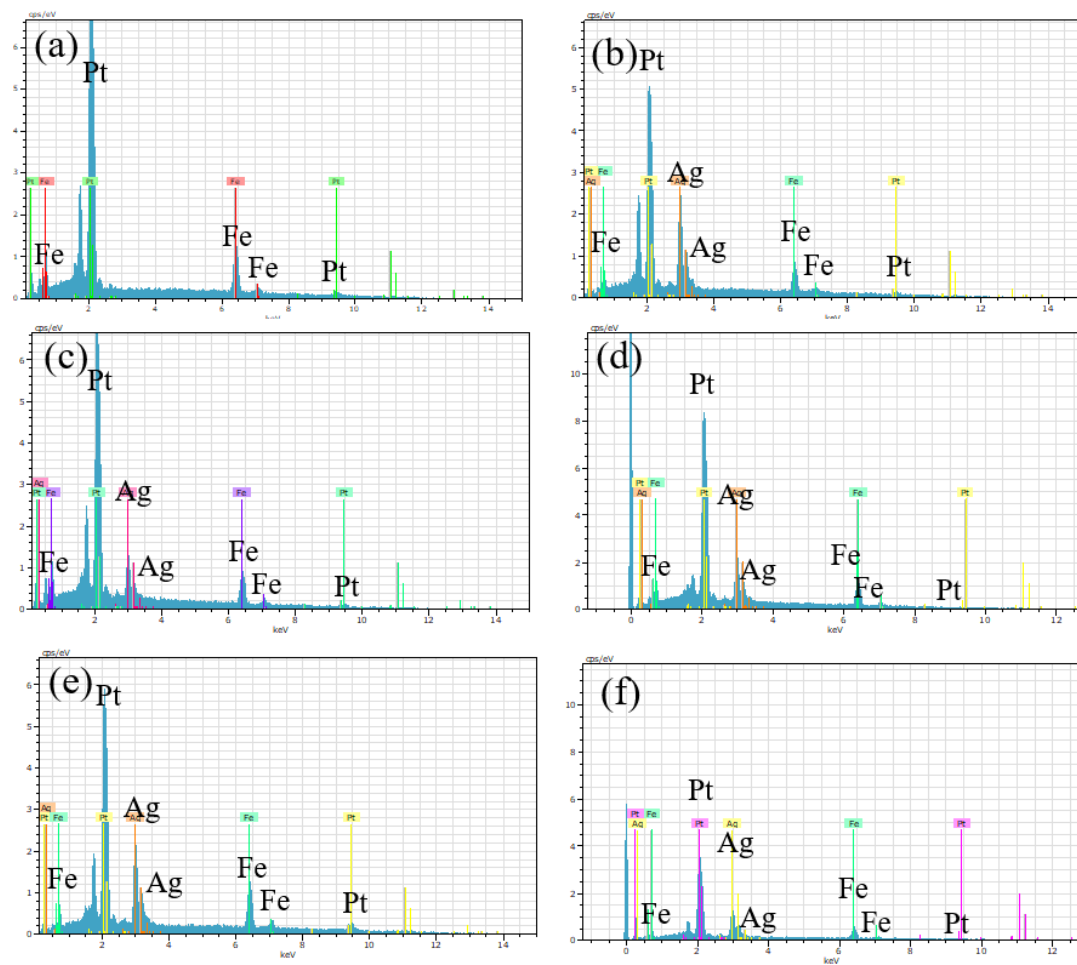

**Fig. S3.** EDS spectra of NPs synthesized with various Ag/Pt mole ratios ( $x$ ): (a)  $x=0$ , (b)  $x=0.4$ , (c)  $x=0.8$ , (d)  $x=1.0$ , (e)  $x=1.2$ , (f)  $x=1.4$ .

## Computational details

The Vienna Ab-initio Simulation Package (VASP) software package developed by the University of Vienna was used to perform first-principles calculations based on spin polarization density functional theory (DFT).<sup>1</sup> The projector-augmented wave (PAW) pseudopotentials were used for electron-ion interactions.<sup>2</sup> At the equiatomic composition,  $L1_0$ -FePt is comprised of alternating atomic planes of Fe and Pt along the unit-cell  $c$  axis. The  $2 \times 2 \times 2$  supercell model with 32 atoms was used to calculate the structure of  $L1_0$ -FePt. The size of the supercell has been fully verified.<sup>3</sup> The disordered model of the FePt binary alloy was generated by the gensqs and mcsqs codes in the Alloy Theory Automation Toolkit (ATAT).<sup>4-6</sup> The correlation functions of two clusters and three clusters match perfectly with the values of the ideal random structure. The models of the ordered and disordered are shown in Fig. S4.

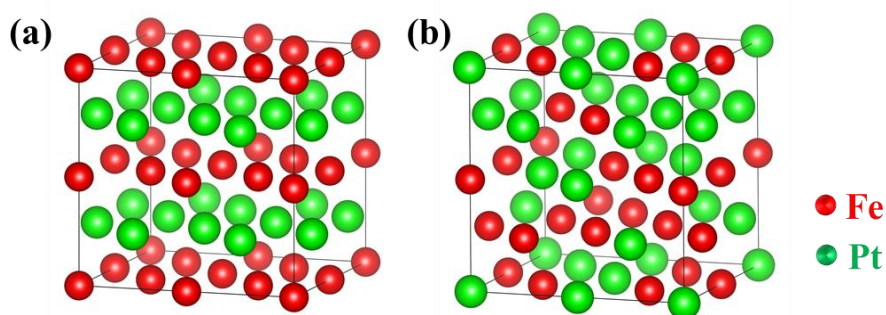

**Fig. S4.** (a) ordered  $L1_0$ -FePt supercell structure, (b) disordered fcc FePt supercell structure.

The substitution formation energies ( $E_{\text{sub}}$ ) is the energy required for the third element to replace the main phase element, which can be used to measure the difficulty of the third element doping in the main phase the  $E_{\text{sub}}$  can be obtained using the following equation<sup>7</sup>:

$$E_{\text{sub}} = E_{\text{doped}} + E_{\text{pure}} + \mu_{\text{lose}} - \mu_x \quad (\text{S1})$$

where the  $E_{\text{doped}}$  and  $E_{\text{pure}}$  are the total energies of FeAgPt and FePt systems respectively.  $\mu_{\text{lose}}$  is the chemical potential of the substituted atoms,  $\mu_x$  is the chemical potential of the Ag elements. All  $\mu_i$  are defined as the value referred to as its most stable phase.

The vacancy formation energy ( $E_{\text{vac}}$ ) is used to describe the energy required to form a point defect. The calculation formula of  $E_{\text{vac}}$  is as follows:

$$E_{\text{vac}} = E_{N-1} - E_N + \mu_x \quad (\text{S2})$$

where  $E_{N-1}$  and  $E_N$  are the total energy of the vacancy system and the perfect system, respectively, and  $\mu_x$  is the chemical potential of the atom at the vacancy.

The results show that the  $E_{\text{sub}}$  of the Ag atom replacing Fe site (28.8 meV·atom<sup>-1</sup>) are lower than that of replacing Pt site (40.1 meV·atom<sup>-1</sup>), indicating that Fe atoms were easier to be replaced by Ag-elements than Pt atoms. The vacancy formation energies  $E_{\text{vac}}$  of Fe atom decreased from 48.0 to 43.8 meV·atom<sup>-1</sup>, and  $E_{\text{vac}}$  of Pt atom decreased from 72.4 to 48.5 meV·atom<sup>-1</sup>.

## References

- 1 R. V. Chepulskii and W. H. Butler. Temperature and particle-size dependence of the equilibrium order parameter of FePt alloys. *Phys. Rev. B*, 2005, 72, 4205.
- 2 G. Kresse and J. Furthmuller. Efficient iterative schemes for ab initio total-energy calculations using a plane-wave basis set. *Phys. Rev. B*, 1996, 54, 11169-11186.
- 3 P. E. Blochl. Projector augmented-wave method. *Phys. Rev. B*, 1994, 50, 17953.
- 4 R. Nazarov, T. Hickel and J. Neugebauer. Ab-initio study of H-vacancy interactions in fcc metals: implications for the formation of superabundant vacancies. *Phys. Rev. B*, 2014, 89, 144108.

- 5 D. Weller, G. Parker, O. Mosendz, A. Lyberatos, D. Mitin, N. Y. Safonova and M. Albrecht. Review article: FePt heat assisted magnetic recording media. *J. Vac. Sci. Technol. B.*, 2016, 34, 060801.
- 6 A. Zunger, S. Wei, L. G. Ferreira and J. E. Bernard. Special quasirandom structures. *Phys. Rev. Lett.*, 1990, 65, 353-356.
- 7 H. B. Luo, Q. M. Hu, J. Du, A. R. Yan and J. P. Liu. Thermal vacancy formation enthalpy of random solid solutions: The FePt case. *Comp. Mater. Sci.*, 2008, 143, 206-211.
